# Supplementary material
Source: PubMed Central journal article supplement (PMC4097711)
Supplement: JCM.00700-14_zjm999093556so1.pdf [file JCM.00700-14_zjm999093556so1.pdf]

Supplemental materials for the article: **Accuracy of MALDI-TOF mass spectrometry for the identification of clinical pathogenic fungi: a meta-analysis**

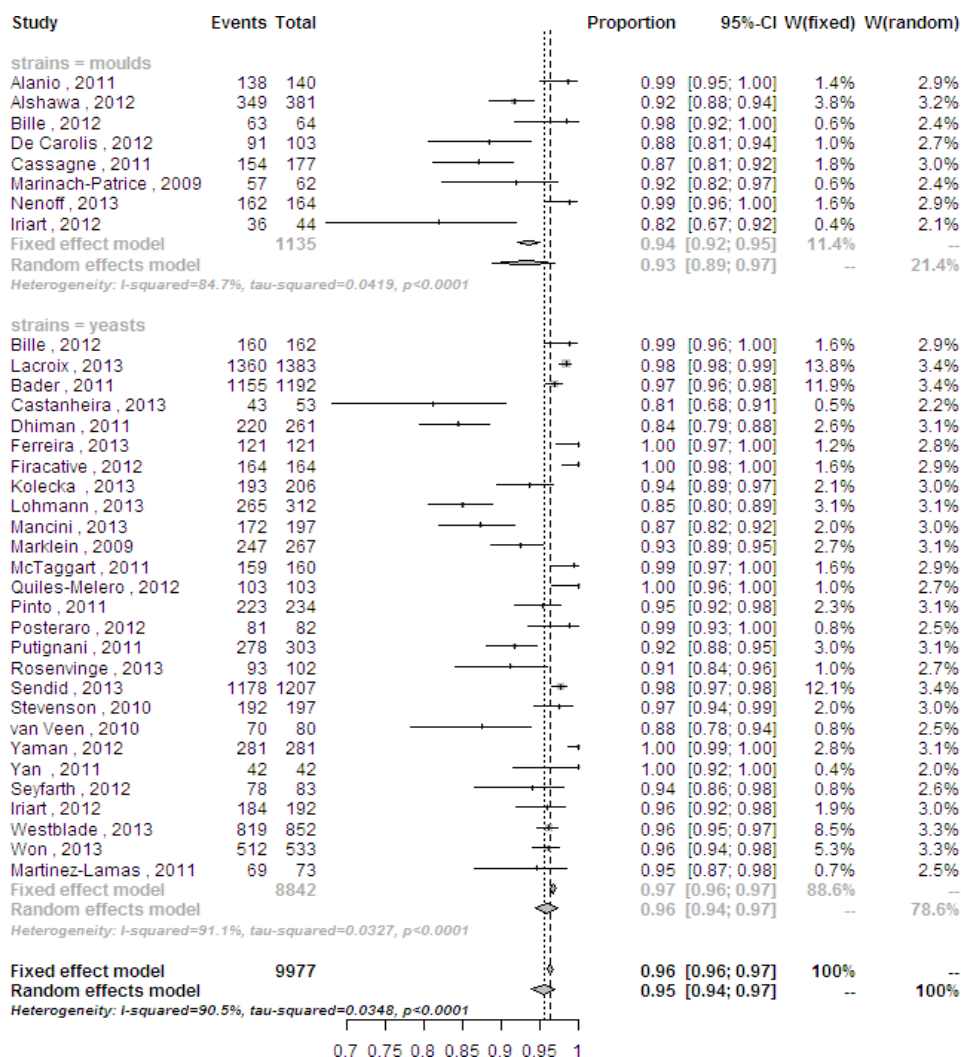

**Fig. S1** Forest plot for the subanalysis on category of strain at the species level. CI, confidence interval; W, weight; fixed, fixed effect model; random, random effects model; Events, number of correct identification; Total, number of total identification. Gray square representing weight of individual studies with fixed-effect model, horizontal line runs through the square representing 95% confidence interval, gray

diamond representing the overall estimate and its confidence interval, dotted vertical line representing the fixed-effect model and dashed vertical line representing the random-effects model.

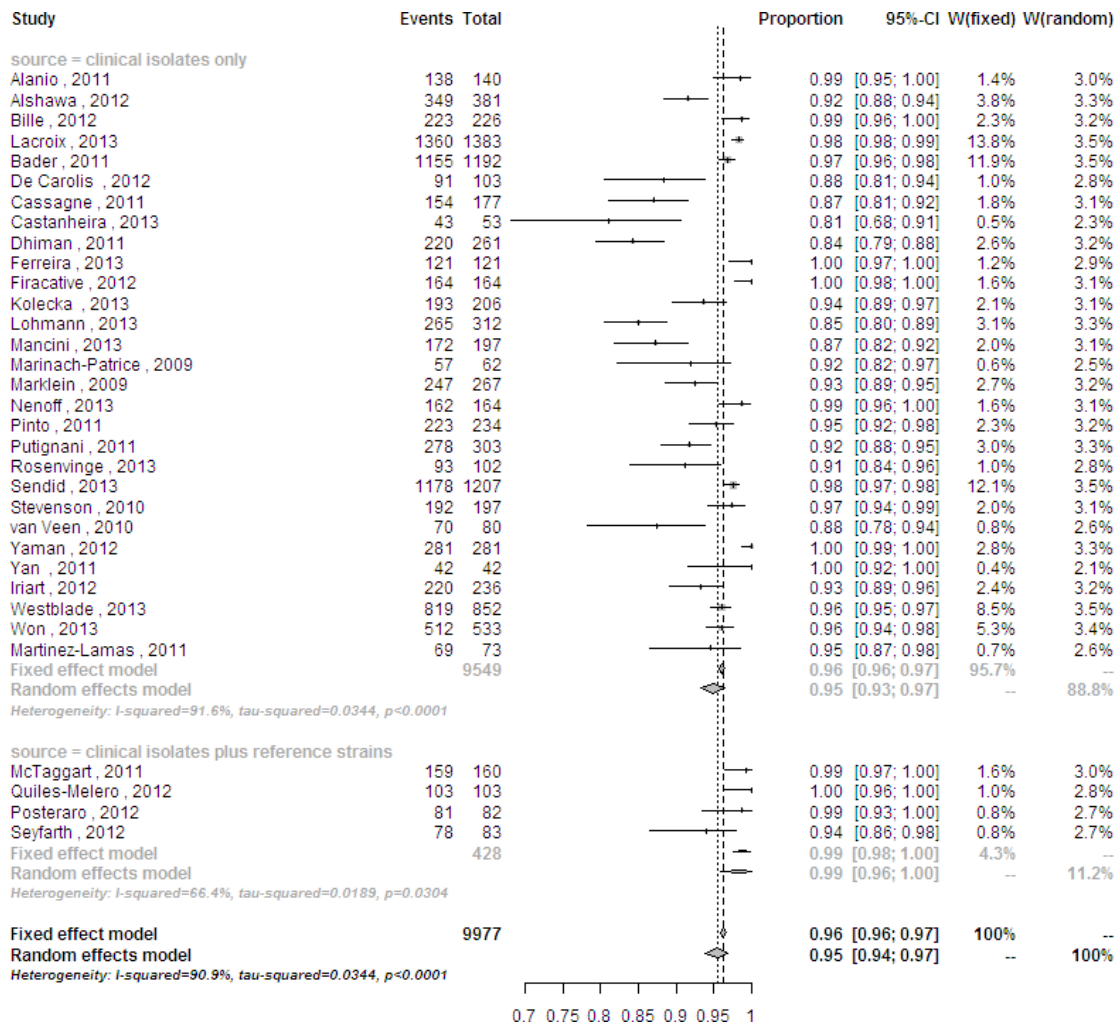

**Fig. S2** Forest plot for the subanalysis on source of strain at the species level. CI, confidence interval; W, weight; fixed, fixed effect model; random, random effects model; Events, number of correct identification; Total, number of total identification.

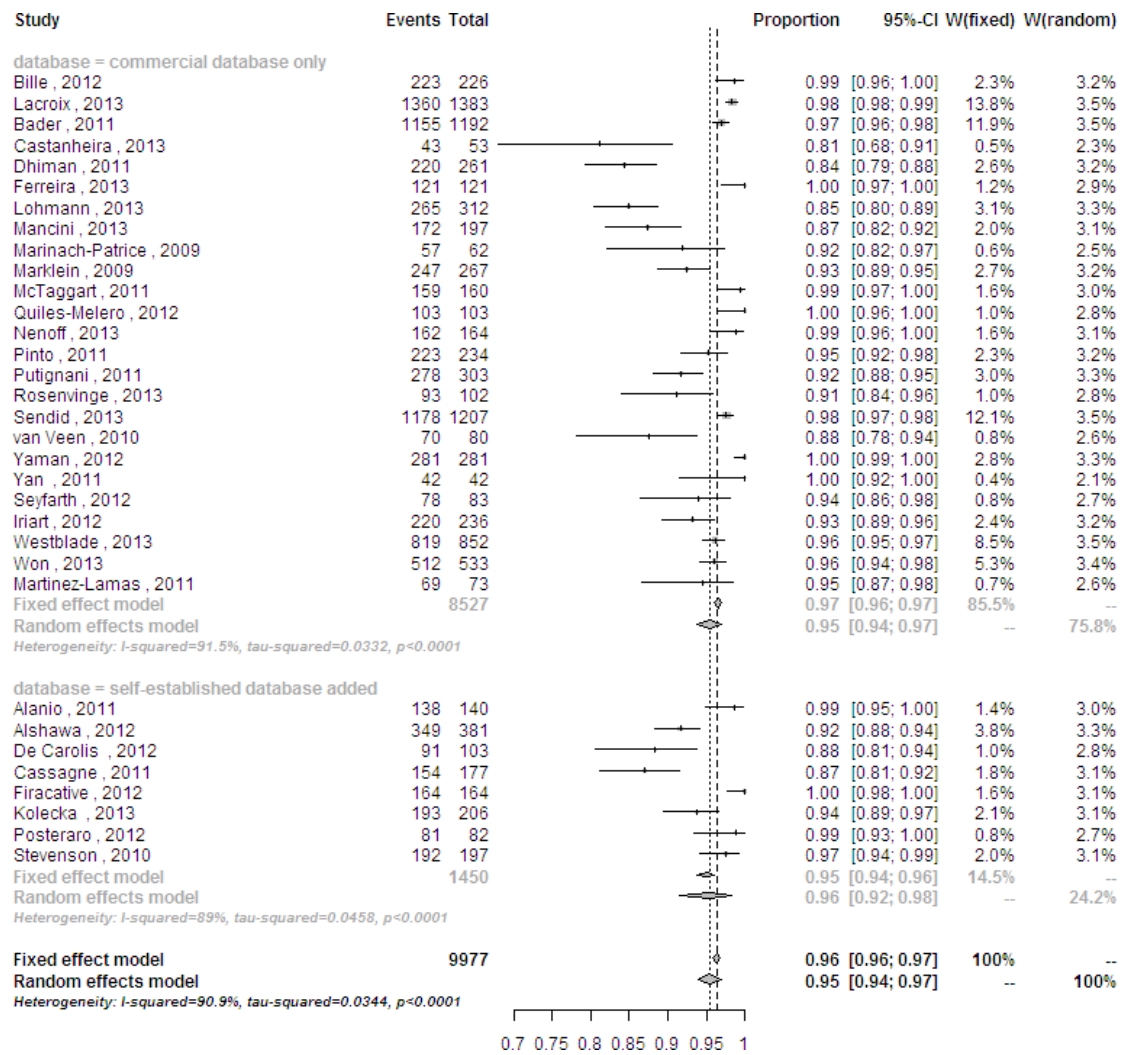

**Fig. S3** Forest plot for the subanalysis on system database at the species level. CI, confidence interval; W, weight; fixed, fixed effect model; random, random effects model; Events, number of correct identification; Total, number of total identification.

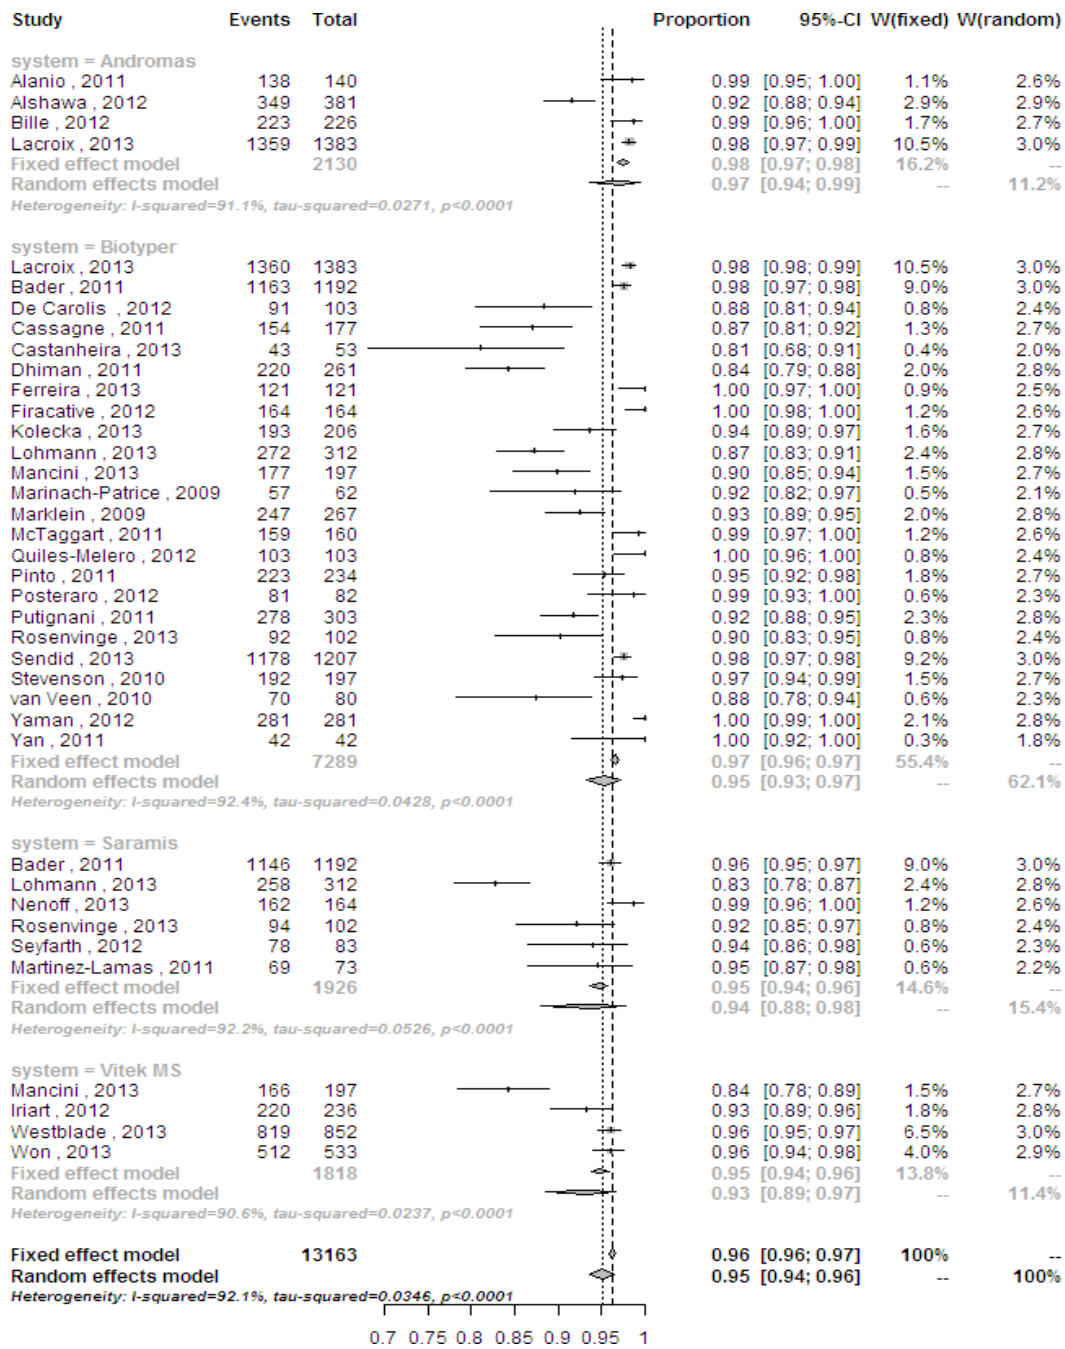

**Fig. S4** Forest plot for the subanalysis on different identification systems at the species level. CI, confidence interval; W, weight; fixed, fixed effect model; random, random effects model; Events, number of correct identification; Total, number of total identification.
